# Supplementary material for: Asymmetric catalytic sulfoxidation by a novel VIV8 cluster catalyst in the presence of serum albumin: a simple and green oxidation system
Source: Royal Society of Chemistry journal article supplement (doi:10.1039/c6ra08153c), 2016-01-01

## Supporting Information

**Table S1.** Selected bond lengths (Å) and angles (°) for **1**

|            |             |            |             |            |             |
|------------|-------------|------------|-------------|------------|-------------|
| V1—O1      | 1.619 (3)   | V2—O6      | 1.625 (3)   | V3—O5      | 1.621 (3)   |
| V1—O10     | 2.009 (3)   | V2—O10     | 2.018 (3)   | V3—O11     | 2.025 (3)   |
| V1—O13     | 2.133 (3)   | V2—O13     | 2.017 (3)   | V3—O13     | 1.870 (3)   |
| V1—O19     | 1.971 (3)   | V2—O14     | 1.888 (3)   | V3—O14     | 2.020 (3)   |
| V1—N1      | 2.134 (4)   | V2—O16     | 2.384 (3)   | V3—O15     | 2.422 (3)   |
| V1—N2      | 2.149 (4)   | V2—O18     | 1.724 (3)   | V3—O20     | 1.742 (3)   |
| V4—O3      | 1.614 (3)   | V5—O4      | 1.617 (3)   | V6—O7      | 1.629 (3)   |
| V4—O11     | 1.999 (3)   | V5—O9      | 2.001 (3)   | V6—O9      | 2.030 (3)   |
| V4—O14     | 2.110 (3)   | V5—O16     | 2.099 (3)   | V6—O14     | 2.393 (3)   |
| V4—O17     | 1.973 (3)   | V5—O18     | 1.961 (3)   | V6—O15     | 1.849 (3)   |
| V4—N3      | 2.149 (4)   | V5—N5      | 2.121 (4)   | V6—O16     | 1.991 (3)   |
| V4—N4      | 2.124 (4)   | V5—N6      | 2.152 (4)   | V6—O17     | 1.748 (3)   |
| V7—O8      | 1.618 (3)   | V7—O16     | 1.898 (3)   | V8—O15     | 2.148 (3)   |
| V7—O12     | 2.005 (3)   | V7—O19     | 1.724 (3)   | V8—O20     | 1.979 (3)   |
| V7—O13     | 2.406 (3)   | V8—O2      | 1.602 (3)   | V8—N7      | 2.149 (4)   |
| V7—O15     | 2.045 (3)   | V8—O12     | 2.009 (3)   | V8—N8      | 2.128 (4)   |
| O1—V1—O10  | 102.45 (13) | O6—V2—O10  | 94.63 (13)  | O5—V3—O11  | 95.33 (13)  |
| O1—V1—O13  | 176.23 (13) | O6—V2—O13  | 104.87 (14) | O5—V3—O13  | 100.65 (14) |
| O1—V1—O19  | 102.96 (14) | O6—V2—O14  | 99.82 (14)  | O5—V3—O14  | 104.23 (14) |
| O1—V1—N1   | 98.35 (14)  | O6—V2—O16  | 176.71 (13) | O5—V3—O15  | 177.32 (13) |
| O1—V1—N2   | 96.05 (15)  | O6—V2—O18  | 104.34 (15) | O5—V3—O20  | 104.99 (15) |
| O10—V1—O13 | 74.59 (11)  | O10—V2—O16 | 88.39 (10)  | O11—V3—O15 | 86.85 (11)  |
| O10—V1—N1  | 158.47 (13) | O13—V2—O10 | 77.00 (11)  | O13—V3—O11 | 153.87 (12) |
| O10—V1—N2  | 92.61 (13)  | O13—V2—O16 | 74.52 (11)  | O13—V3—O14 | 79.26 (12)  |
| O13—V1—N1  | 84.39 (12)  | O14—V2—O10 | 154.41 (12) | O13—V3—O15 | 76.76 (11)  |
| O13—V1—N2  | 81.86 (12)  | O14—V2—O13 | 78.92 (11)  | O14—V3—O11 | 76.84 (11)  |

|            |             |            |             |            |             |
|------------|-------------|------------|-------------|------------|-------------|
| O19—V1—O10 | 88.31 (12)  | O14—V2—O16 | 76.89 (11)  | O14—V3—O15 | 74.71 (10)  |
| O19—V1—O13 | 79.43 (11)  | O18—V2—O10 | 93.71 (13)  | O20—V3—O11 | 92.73 (12)  |
| O19—V1—N1  | 92.43 (12)  | O18—V2—O13 | 149.94 (13) | O20—V3—O13 | 102.81 (13) |
| O19—V1—N2  | 160.31 (13) | O18—V2—O14 | 102.92 (13) | O20—V3—O14 | 149.72 (13) |
| N1—V1—N2   | 79.64 (13)  | O18—V2—O16 | 76.72 (12)  | O20—V3—O15 | 76.42 (12)  |
| O3—V4—O11  | 101.93 (14) | O4—V5—O9   | 101.39 (14) | O7—V6—O9   | 94.12 (14)  |
| O3—V4—O14  | 176.71 (15) | O4—V5—O16  | 174.93 (14) | O7—V6—O14  | 179.26 (13) |
| O3—V4—O17  | 102.41 (15) | O4—V5—O18  | 103.67 (14) | O7—V6—O15  | 101.02 (14) |
| O3—V4—N3   | 94.67 (16)  | O4—V5—N5   | 97.18 (16)  | O7—V6—O16  | 104.58 (13) |
| O3—V4—N4   | 97.15 (15)  | O4—V5—N6   | 94.43 (16)  | O7—V6—O17  | 104.11 (14) |
| O11—V4—O14 | 75.36 (11)  | O9—V5—O16  | 74.73 (11)  | O9—V6—O14  | 86.27 (11)  |
| O11—V4—N3  | 93.79 (13)  | O9—V5—N5   | 160.65 (14) | O15—V6—O9  | 155.03 (12) |
| O11—V4—N4  | 160.40 (13) | O9—V5—N6   | 93.06 (13)  | O15—V6—O14 | 78.39 (11)  |
| O14—V4—N3  | 83.71 (13)  | O16—V5—N5  | 86.42 (13)  | O15—V6—O16 | 80.54 (12)  |
| O14—V4—N4  | 85.42 (12)  | O16—V5—N6  | 82.64 (13)  | O16—V6—O9  | 76.48 (11)  |
| O17—V4—O11 | 88.48 (12)  | O18—V5—O9  | 87.95 (12)  | O16—V6—O14 | 74.90 (10)  |
| O17—V4—O14 | 79.52 (11)  | O18—V5—O16 | 79.63 (11)  | O17—V6—O9  | 91.79 (13)  |
| O17—V4—N3  | 161.93 (13) | O18—V5—N5  | 92.96 (13)  | O17—V6—O14 | 76.50 (12)  |
| O17—V4—N4  | 91.84 (13)  | O18—V5—N6  | 161.31 (13) | O17—V6—O15 | 103.45 (13) |
| N4—V4—N3   | 80.09 (14)  | N5—V5—N6   | 80.03 (14)  | O17—V6—O16 | 149.65 (13) |
| O8—V7—O12  | 96.36 (14)  | O16—V7—O15 | 78.03 (11)  | O12—V8—O15 | 74.01 (11)  |
| O8—V7—O13  | 175.42 (13) | O19—V7—O12 | 94.25 (12)  | O12—V8—N7  | 92.29 (13)  |
| O8—V7—O15  | 104.71 (13) | O19—V7—O13 | 76.99 (12)  | O12—V8—N8  | 159.45 (14) |
| O8—V7—O16  | 99.41 (14)  | O19—V7—O15 | 149.96 (13) | O15—V8—N7  | 81.19 (13)  |
| O8—V7—O19  | 104.67 (15) | O19—V7—O16 | 103.14 (13) | O20—V8—O12 | 88.82 (12)  |
| O12—V7—O13 | 87.73 (11)  | O2—V8—O12  | 100.54 (14) | O20—V8—O15 | 79.07 (11)  |
| O12—V7—O15 | 76.40 (11)  | O2—V8—O15  | 174.17 (15) | O20—V8—N7  | 159.11 (13) |
| O15—V7—O13 | 74.20 (10)  | O2—V8—O20  | 103.16 (15) | O20—V8—N8  | 91.66 (13)  |
| O16—V7—O12 | 152.63 (12) | O2—V8—N7   | 97.15 (15)  | N8—V8—O15  | 85.91 (13)  |

O16—V7—O13 76.03 (11) O2—V8—N8 99.36 (16) N8—V8—N7 80.13 (14)

The space-filling plot of the  $[V_8O_{12}(OH)_4(CH_3O)_4(DAC)_4]$  unit with a diameter of about 1.6 nm is revealed in Figure 1g. The adjacent  $V_8$  units are expanded each other through H-bond between the  $V_8$  units and the lattice methanol molecules with the nearest distance of 11.999 (1) Å. The nearest  $V \cdots V$  distance between the adjacent  $V_8$  units is 5.2172 (5) Å, indicating the presence of weak magnetic exchange interaction between them. (Figure S1)

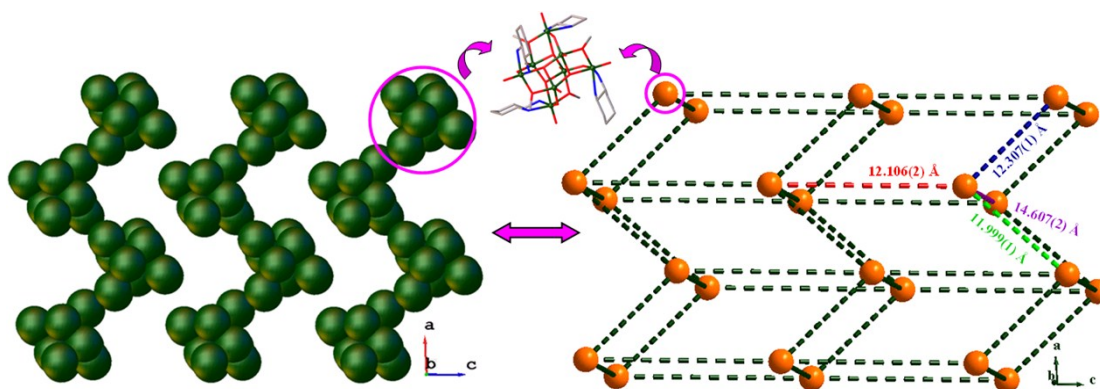

**Figure S1** Packing of the  $V_8$  clusters within the crystallographic  $ac$  plane.

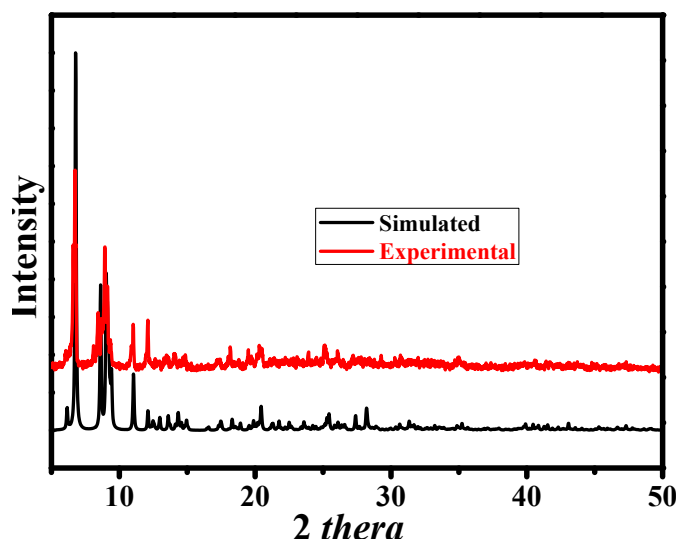

**Figure S2** Measured and calculated powder X-ray diffraction (PXRD) pattern of 1.

## Magnetic Properties

Magnetic susceptibility measurement was carried out on polycrystalline sample of **1** in the temperature range 2.0-300.0 K at 1000 Oe. (Figure S3a) The data above 2 K follow the Curie-Weiss law with  $C = 3.12 \text{ cm}^3 \cdot \text{K} \cdot \text{mol}^{-1}$  and  $\theta = -13.05 \text{ K}$ . The  $\chi_{\text{M}}T$  value at 300 K is  $2.98 \text{ cm}^3 \cdot \text{K} \cdot \text{mol}^{-1}$ , which is in accord with the spin-only value  $3 \text{ cm}^3 \cdot \text{K} \cdot \text{mol}^{-1}$  for eight magnetically active V(IV) ions ( $S = 1/2$ ,  $g = 2.0$ ). As the temperature is lowered, the  $\chi_{\text{M}}T$  values decrease continuously and reaches a local minimum of  $0.34 \text{ cm}^3 \cdot \text{K} \cdot \text{mol}^{-1}$  at about 2 K, indicative of a weak antiferromagnetic interaction. The in- and out-of-phase ac susceptibilities have no dependence on frequency between 2 and 10 K for **1** indicating that there is no single-molecule magnet (SMM) behavior in **1** (Figure S3b). We also investigated the variation of the magnetization  $M$  with the applied magnetic field  $H$  for **1** in the range of 0-50 kOe at 2 K (Figure S3c). The magnetization increase nearly linearly to  $0.96 \text{ N}\beta$  at 50 kOe, far from the saturation sum values of eight V(IV) ions. And no obvious hysteresis loops are observed for **1**.

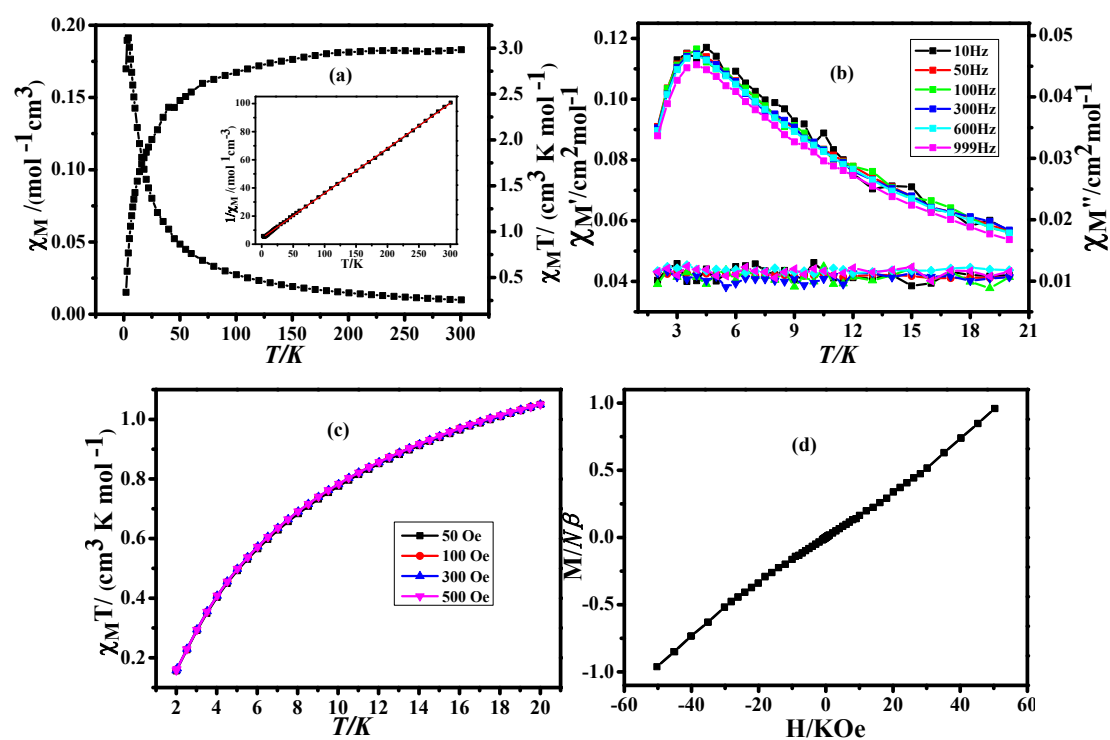

**Figure S3** (a) Plots of  $\chi_M T$  vs T,  $\chi_M$  vs T and  $\chi_M^{-1}$  vs T (inset) for **1**; (b) the zero-field ac magnetic susceptibilities from 2- 10 K for **1**; (c) FC magnetization of them in different field; (d) field dependency of magnetization of **1** at 2 K.

## Thermal Analyses

The thermogravimetric (TG) analysis was performed in N<sub>2</sub> atmosphere on polycrystalline sample of complex **1**, and the TG curve is shown in Figure S4. The first weight loss of 15.15% between 35 and 102 °C corresponds to the release of the lattice methanol molecules (calculated, 15.27%). The residual framework decomposed beyond 371 °C in a series of complicated weight losses until 532 °C.

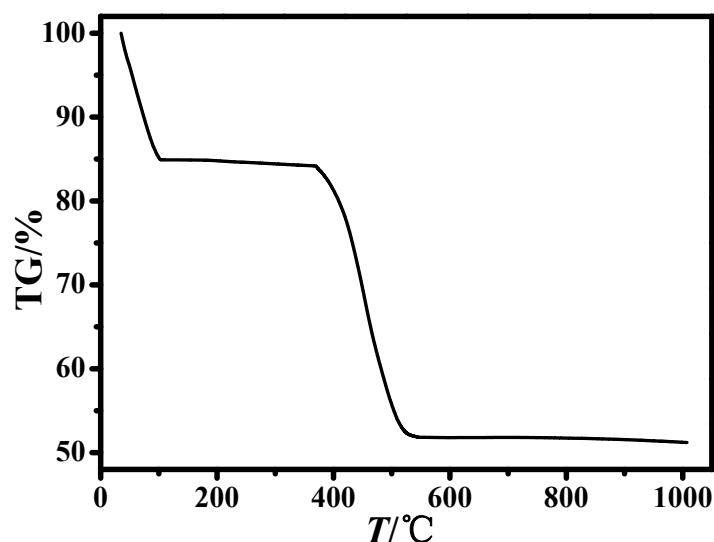

**Figure S4** TGA curve for complexes **1**.

## <sup>1</sup>H NMR and <sup>13</sup>C NMR of sulfoxides:

**Methyl phenyl sulfoxide.** Yellow oil, purified by flash chromatography on silica gel (ethyl acetate/petroleum ether, v/v = 3:1) (89%). <sup>1</sup>H NMR (500 MHz, CDCl<sub>3</sub>) δ (ppm): 7.59 (dd, *J* = 7.90, 1.4 Hz, 2H), 7.49-7.41 (m, 3H), 2.66 (s, 3H); <sup>13</sup>C NMR (126 MHz, CDCl<sub>3</sub>) δ (ppm): 145.6, 133.7, 131.0, 129.3, 127.3, 123.4, 43.9. Determination of *ee*

by HPLC analysis: *n*-hexane/2-PrOH (80:20), 0.8 mL/min, 254 nm,  $t_r$  (S) = 14.0 min,  $t_r$  (R) = 24.0 min.

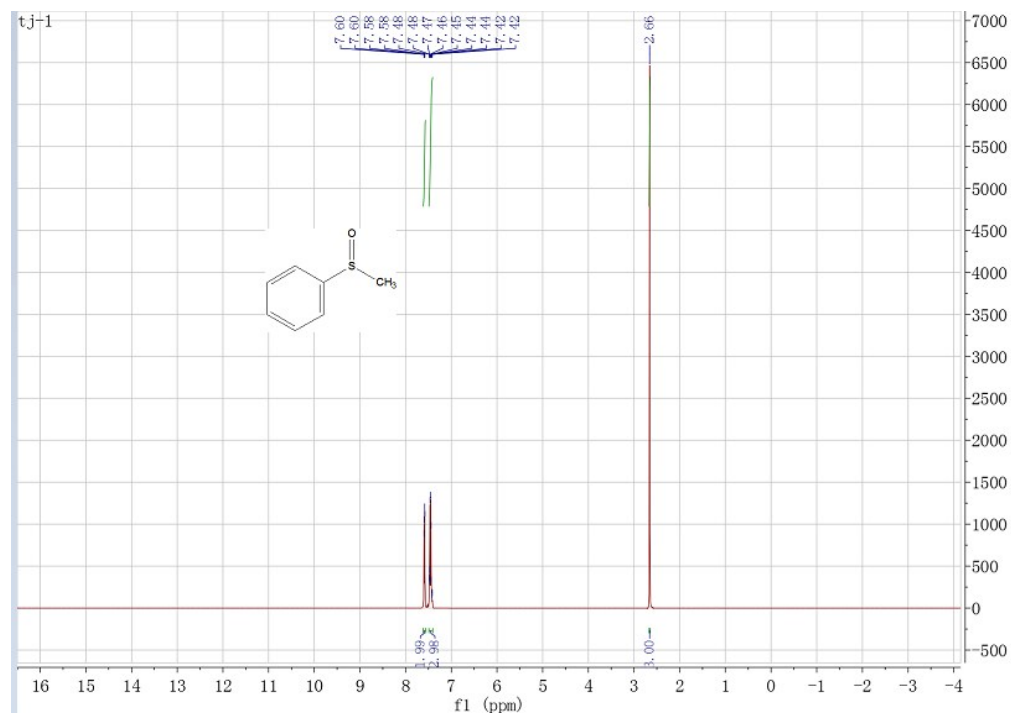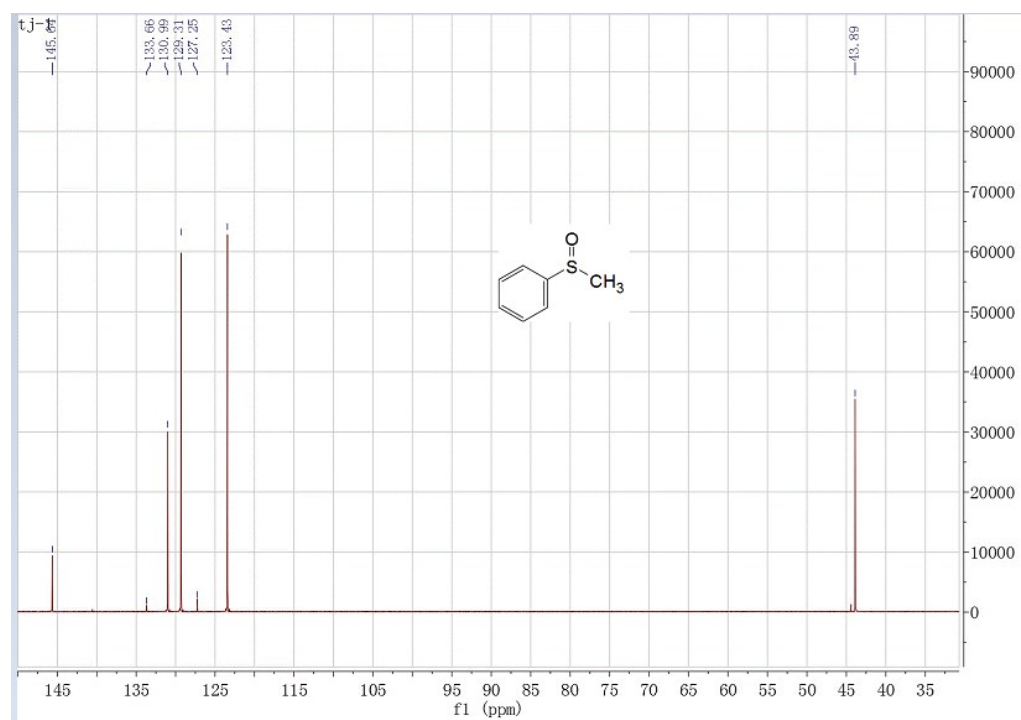

**2-Chlorophenyl methyl sulfoxide.** Colorless oil, purified by flash chromatography on silica gel (ethyl acetate/petroleum ether,  $v/v = 2:3$ ) (29%).  $^1\text{H}$  NMR (500 MHz,  $\text{CDCl}_3$ )  $\delta$  (ppm): 7.99 (dd,  $J = 7.8, 1.6$  Hz, 1H), 7.57 (td,  $J = 7.7, 1.2$  Hz, 1H), 7.48 (td,

$J = 7.6, 1.6$  Hz, 1H), 7.43 (dd,  $J = 7.9, 1.1$  Hz, 1H), 2.86 (s, 3H);  $^{13}\text{C}$  NMR (126 MHz,  $\text{CDCl}_3$ )  $\delta$  (ppm): 143.6, 132.0, 129.8, 129.8, 128.2, 125.4, 41.7. Determination of *ee* by HPLC analysis: *n*-hexane/2-PrOH (90:10), 1 mL/min, 254 nm,  $t_r$  (*S*) = 11.3 min,  $t_r$  (*R*) = 22.0 min.

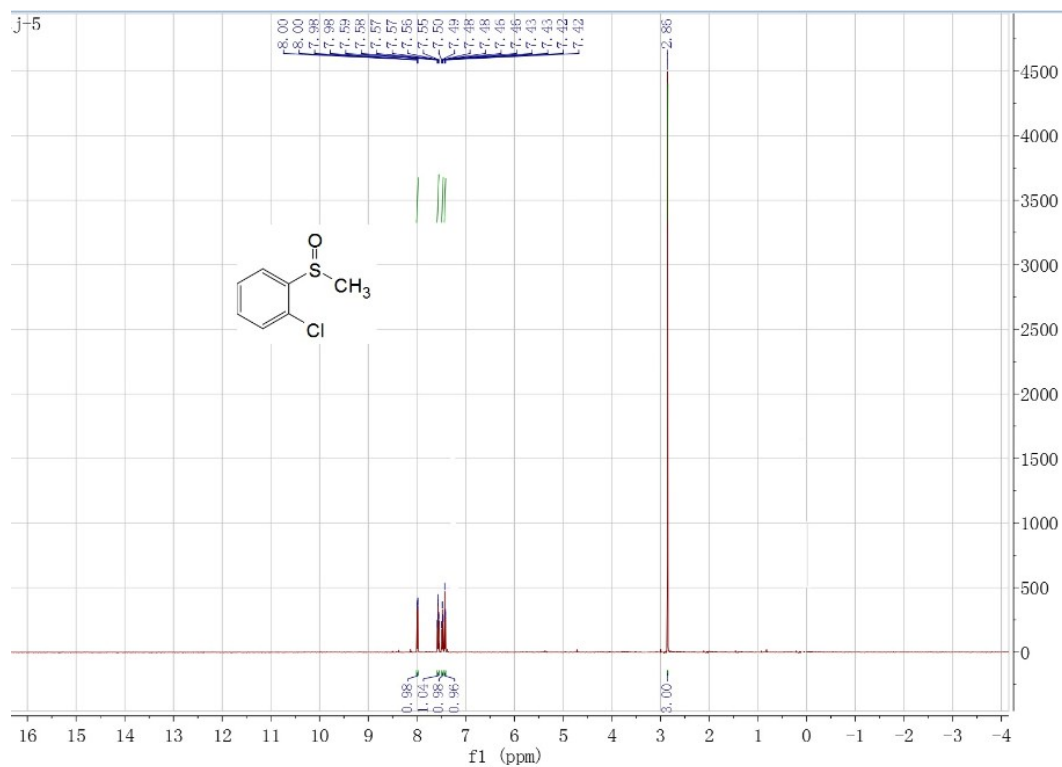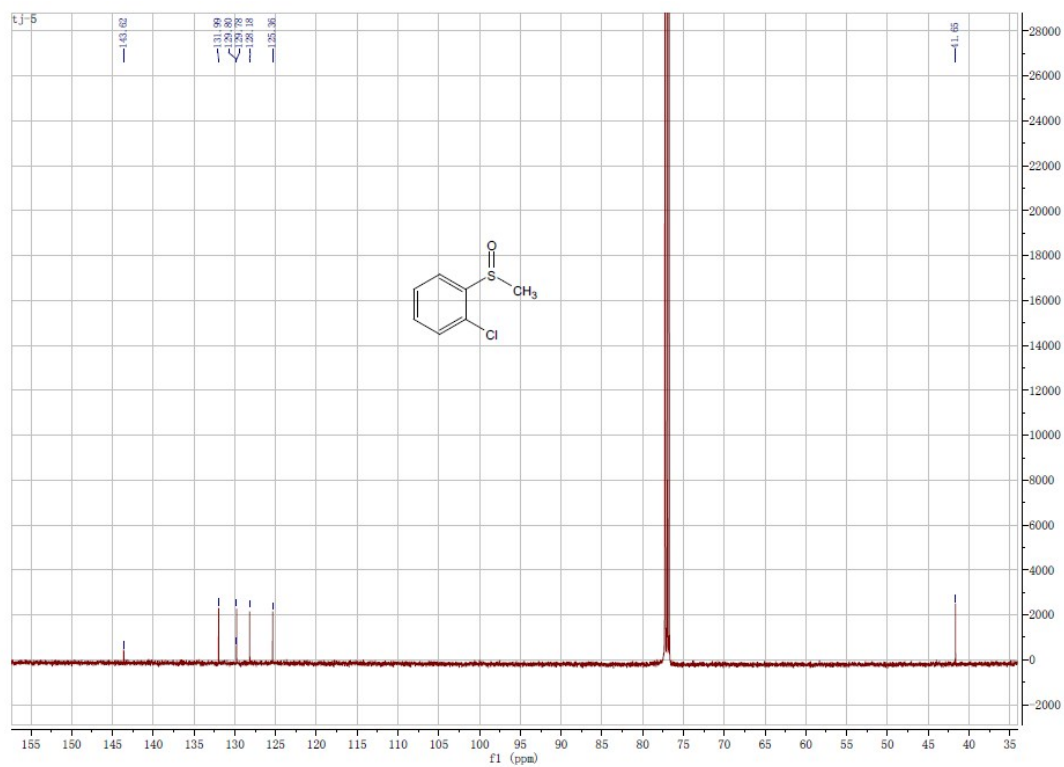

**3-Chlorophenyl methyl sulfoxide.** Colorless oil, purified by flash chromatography on silica gel (ethyl acetate/petroleum ether,  $v/v = 2:3$ ) (40%).  $^1\text{H}$  NMR (500 MHz,  $\text{CDCl}_3$ )  $\delta$  (ppm): 7.69 (t,  $J = 1.1$  Hz, 1H), 7.53 (qd,  $J = 3.8, 1.3$  Hz, 1H), 7.50 (td,  $J = 4.3, 2.0$  Hz, 2H), 2.77 (s, 3H);  $^{13}\text{C}$  NMR (126 MHz,  $\text{CDCl}_3$ )  $\delta$  (ppm): 147.9, 135.8, 131.2, 130.6, 123.7, 121.6, 44.0. Determination of  $ee$  by HPLC analysis:  $n$ -hexane/2-PrOH (90:10), 1 mL/min, 254 nm,  $t_r(S) = 15.0$  min,  $t_r(R) = 21.5$  min.

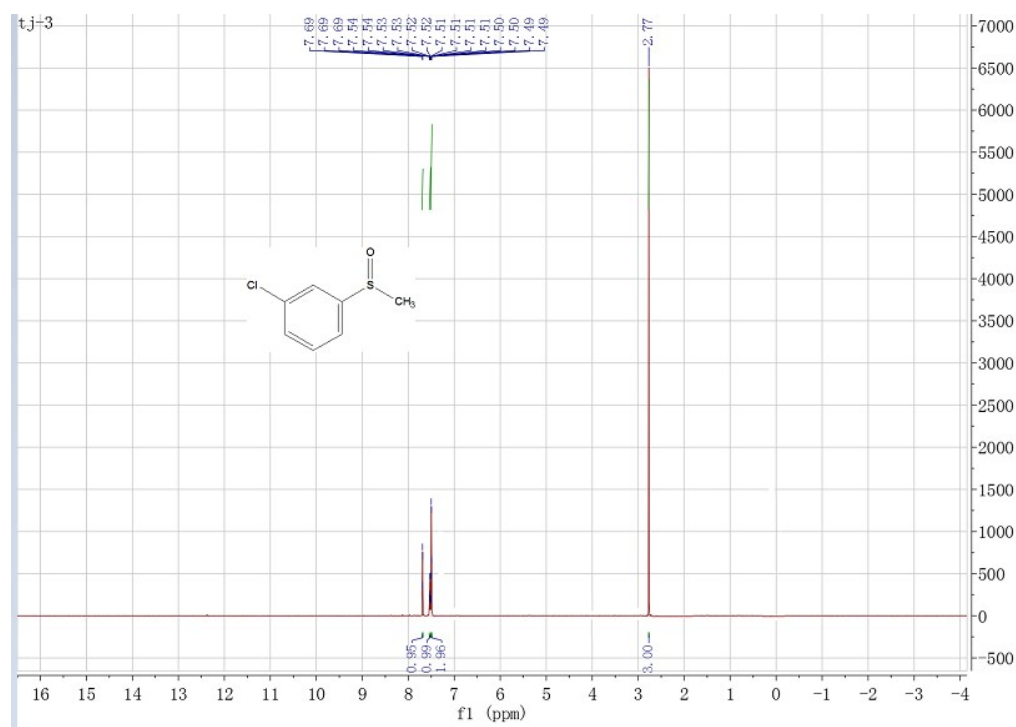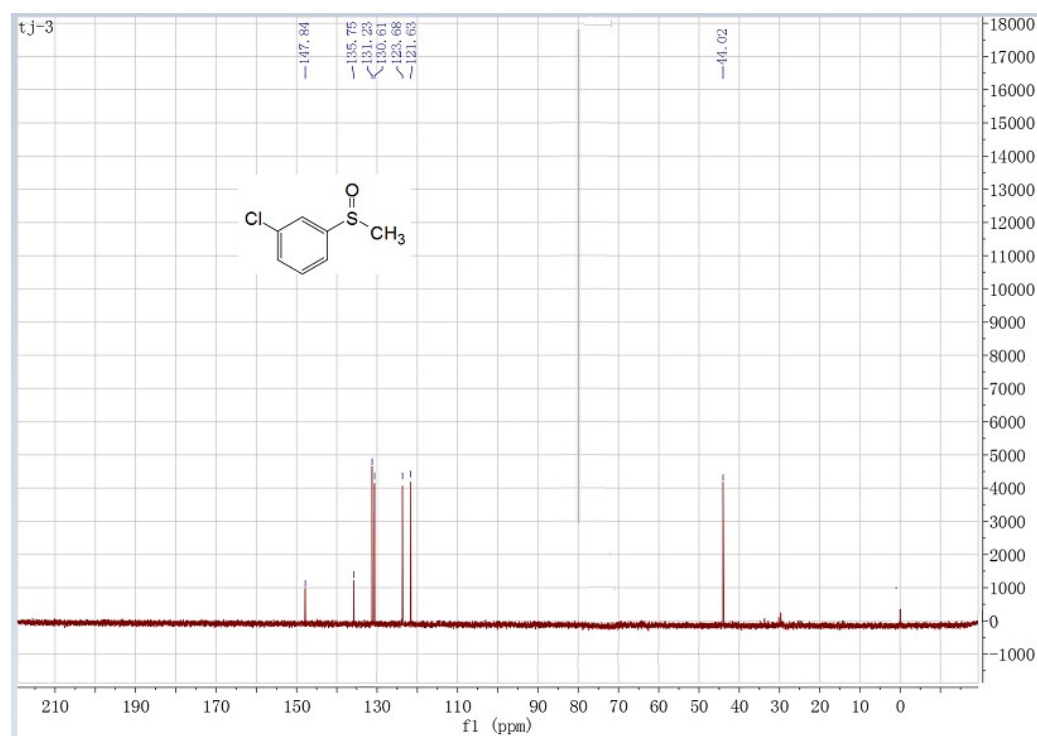



**3-Bromophenyl methyl sulfoxide.** Colorless oil, purified by flash chromatography on silica gel (ethyl acetate/petroleum ether,  $v/v = 2:3$ ) (46%).  $^1\text{H}$  NMR (500 MHz,  $\text{CDCl}_3$ )  $\delta$  (ppm): 7.84 (t,  $J = 1.7$  Hz, 1H), 7.67-7.64 (m, 1H), 7.58 (dd,  $J = 7.8, 1.1$  Hz, 1H), 7.43 (t,  $J = 7.9$  Hz, 1H), 2.77 (s, 3H);  $^{13}\text{C}$  NMR (126 MHz,  $\text{CDCl}_3$ )  $\delta$  (ppm): 148.0, 134.2, 130.9, 126.5, 123.6, 122.0, 44.0. Determination of  $ee$  by HPLC analysis:  $n$ -hexane/2-PrOH (80:20), 1 mL/min, 254 nm,  $t_r$  (S) = 10.7 min,  $t_r$  (R) = 16.1 min.

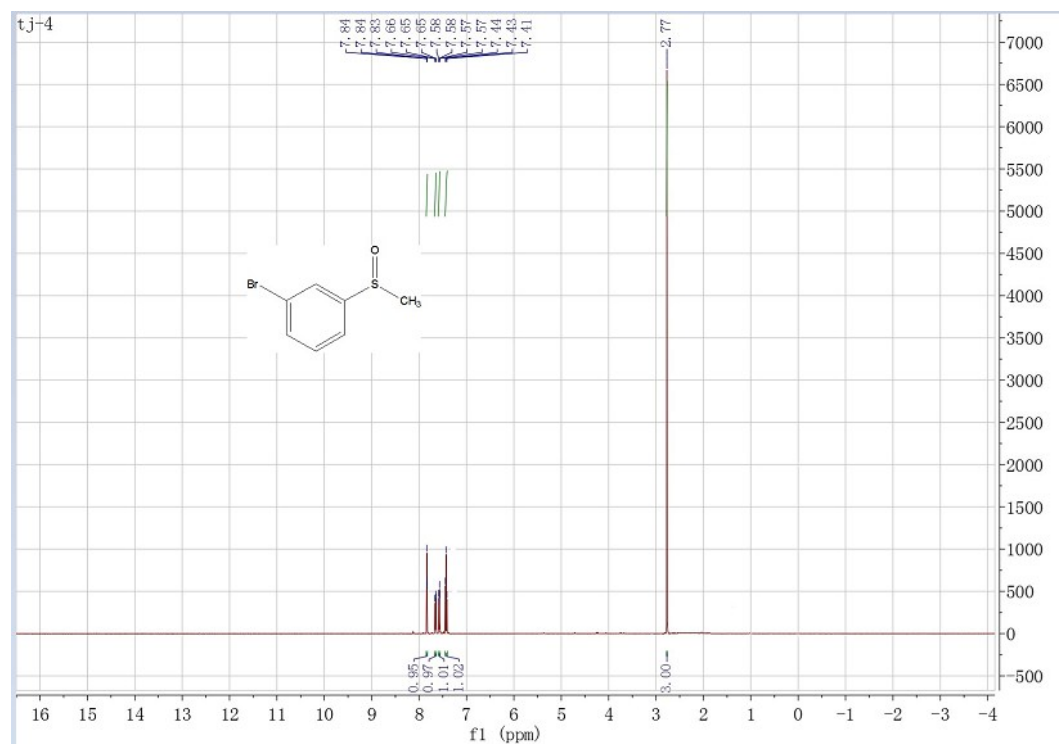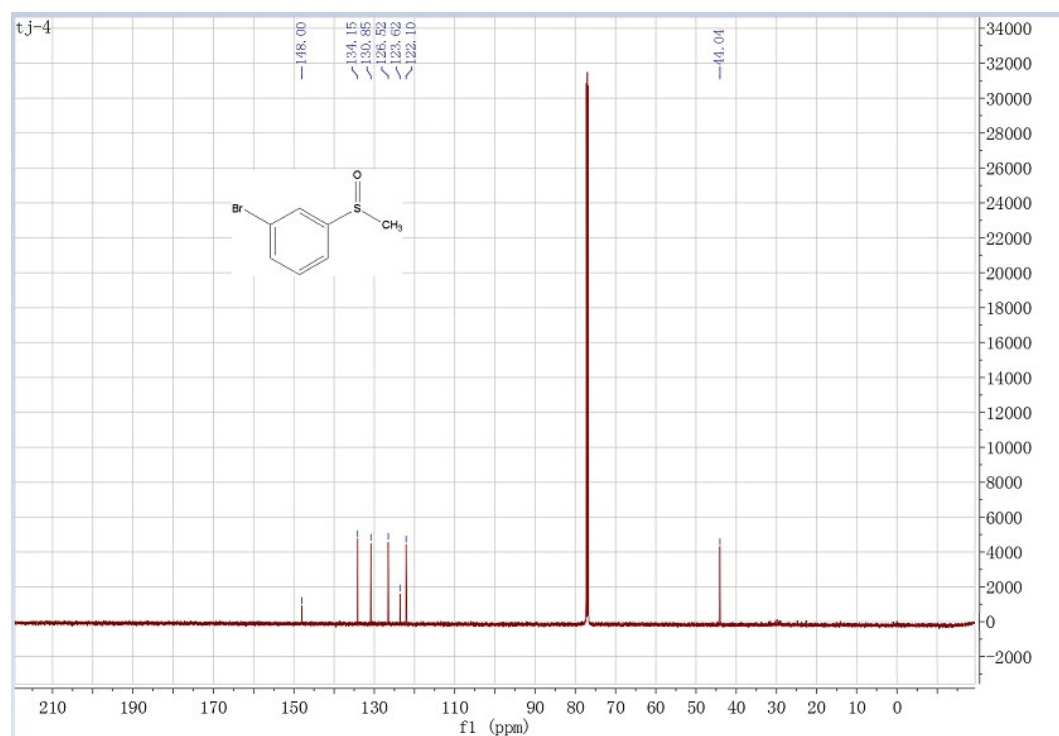

**4-Chlorophenyl methyl sulfoxide.** Colorless oil, purified by flash chromatography on silica gel (ethyl acetate/petroleum ether,  $v/v = 2:3$ ) (63%).  $^1\text{H}$  NMR (500 MHz,  $\text{CDCl}_3$ )  $\delta$  (ppm): 7.63-7.60 (m, 2H), 7.55-7.52 (m, 2H), 2.74 (s, 3H);  $^{13}\text{C}$  NMR (126 MHz,  $\text{CDCl}_3$ )  $\delta$  (ppm): 144.2, 137.3, 131.1, 129.7, 128.9, 125.0, 44.0. Determination of  $ee$  by HPLC analysis:  $n$ -hexane/2-PrOH (90:10), 1 mL/min, 254 nm,  $t_r$  ( $S$ ) = 14.2 min,  $t_r$  ( $R$ ) = 23.7 min.

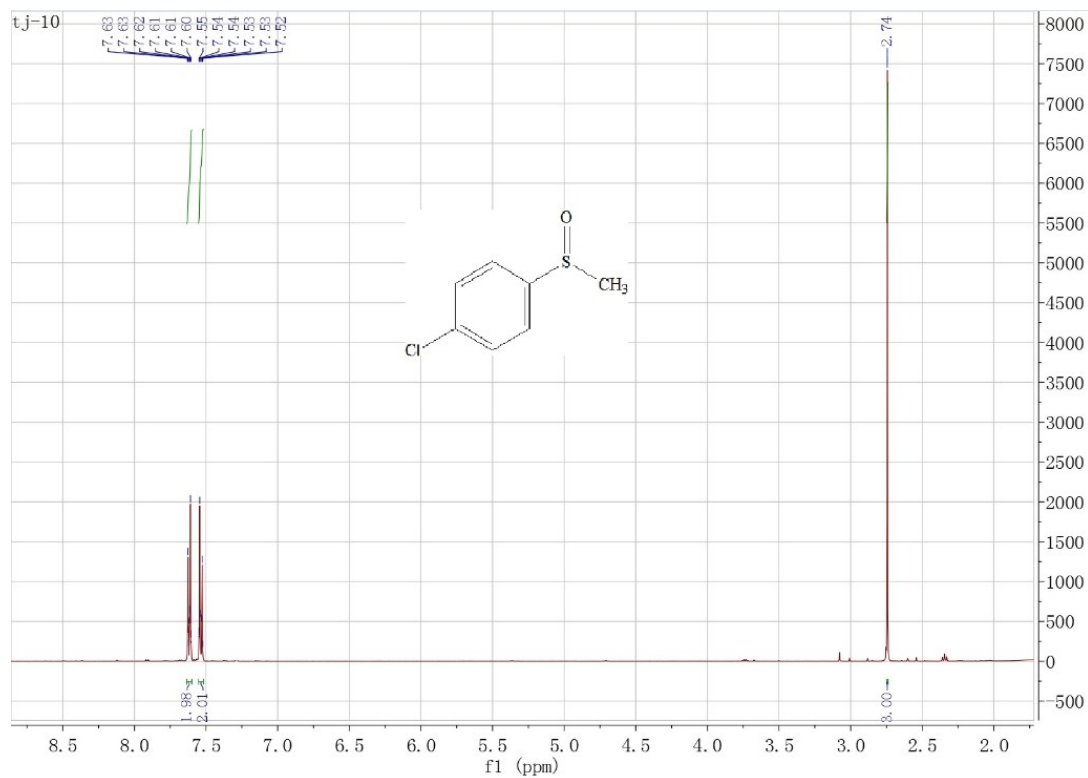

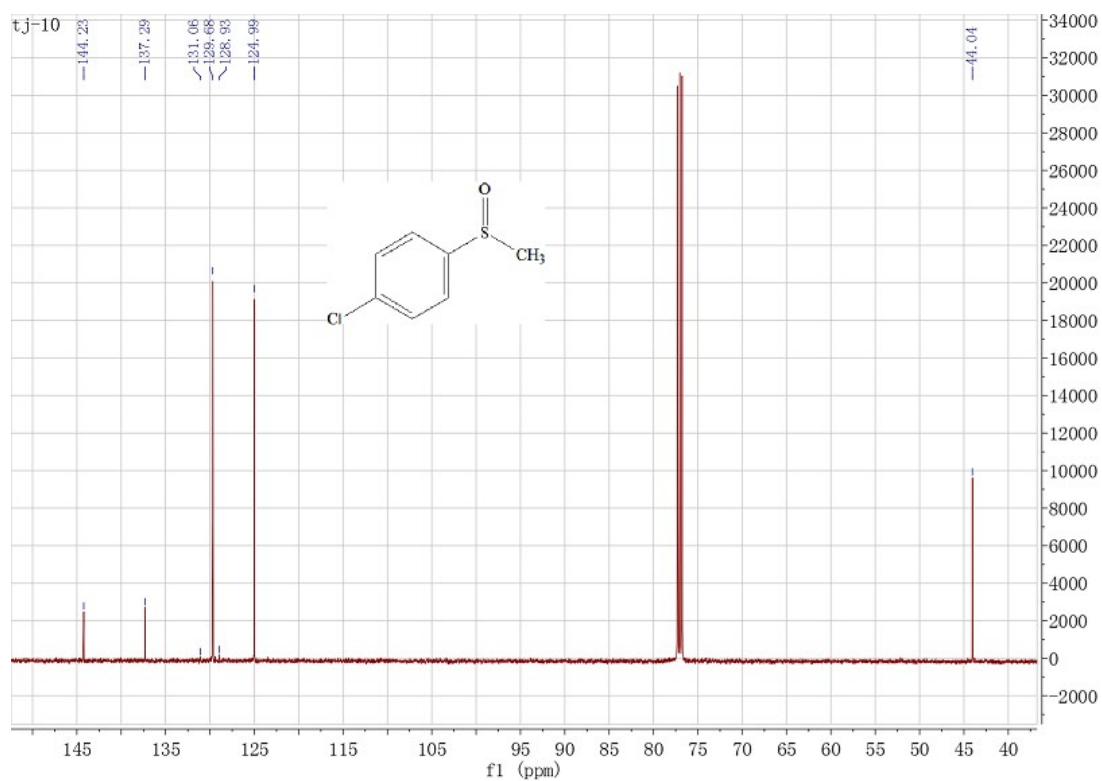

**4-Bromophenyl methyl sulfoxide.** Colorless oil, purified by flash chromatography on silica gel (ethyl acetate/petroleum ether,  $v/v = 2:3$ ) (44%).  $^1\text{H}$  NMR (500 MHz,  $\text{CDCl}_3$ )  $\delta$  (ppm): 7.72-7.68 (m, 2H), 7.57-7.53 (m, 2H), 2.75 (s, 3H);  $^{13}\text{C}$  NMR(126 MHz,  $\text{CDCl}_3$ )  $\delta$  (ppm): 144.9, 132.7, 132.6, 129.0, 125.5, 125.2, 44.0. Determination of *ee* by HPLC analysis: *n*-hexane/2-PrOH (80:20), 0.8 mL/min, 254 nm,  $t_r$  (*S*) = 12.2 min,  $t_r$  (*R*) = 17.7 min.

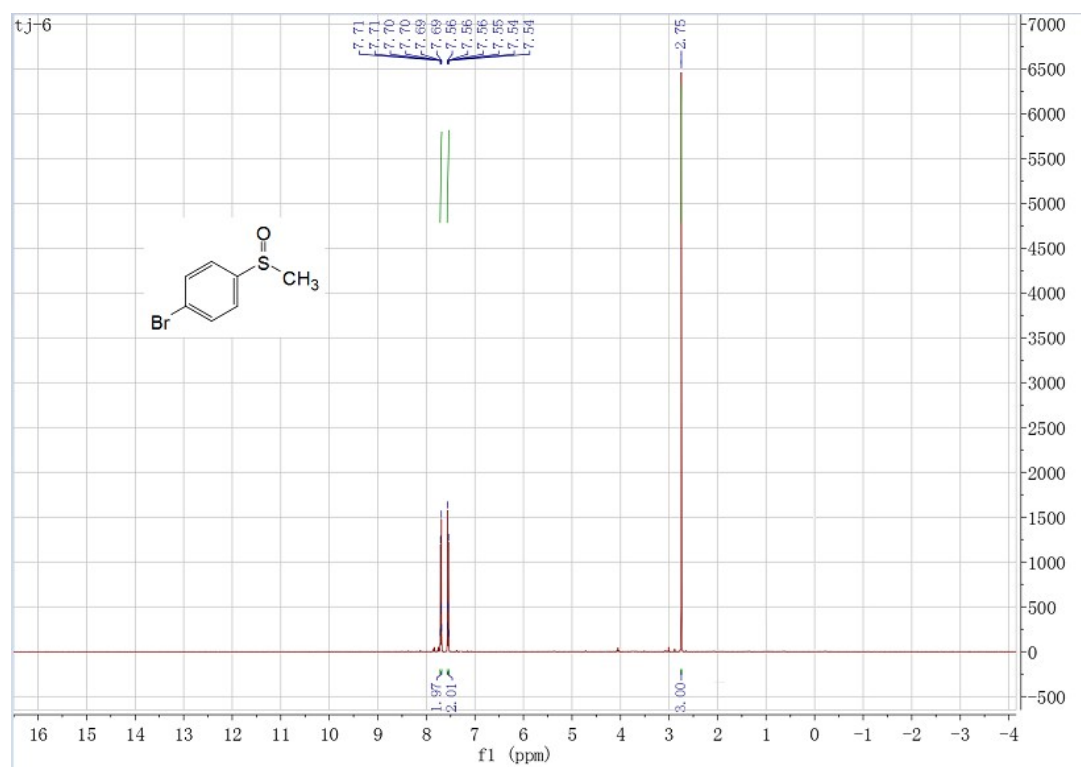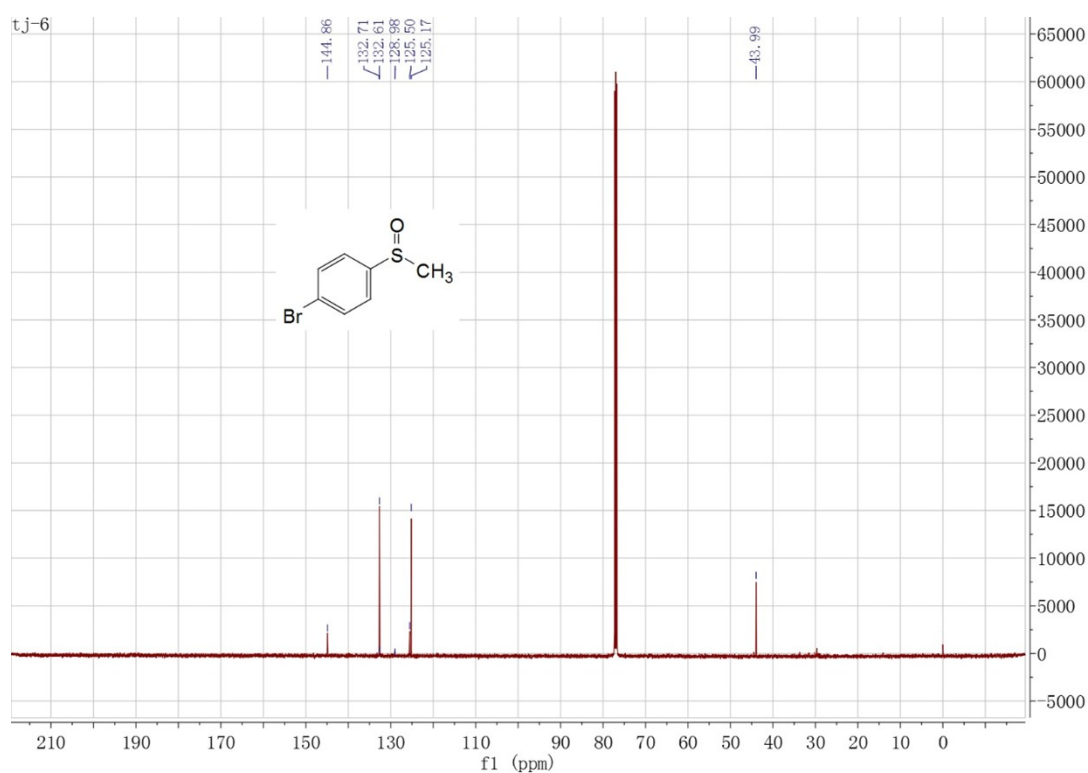

**4-Methylphenyl methyl sulfoxide.** Colorless oil, purified by flash chromatography on silica gel (ethyl acetate/petroleum ether,  $v/v = 2:3$ ) (91%).  $^1\text{H}$  NMR (500 MHz,  $\text{CDCl}_3$ )  $\delta$  (ppm): 7.53-7.49 (m, 2H), 7.30 (d,  $J = 8.0$  Hz, 2H), 2.68 (s, 3H), 2.38 (s, 3H);  $^{13}\text{C}$  NMR (126 MHz,  $\text{CDCl}_3$ )  $\delta$  (ppm): 142.3, 141.5, 130.0, 129.8, 123.5, 123.3,

43.9, 21.4. Determination of *ee* by HPLC analysis: *n*-hexane/2-PrOH (50:50), 0.5 mL/min, 254 nm,  $t_r(S) = 9.7$  min,  $t_r(R) = 16.5$  min.

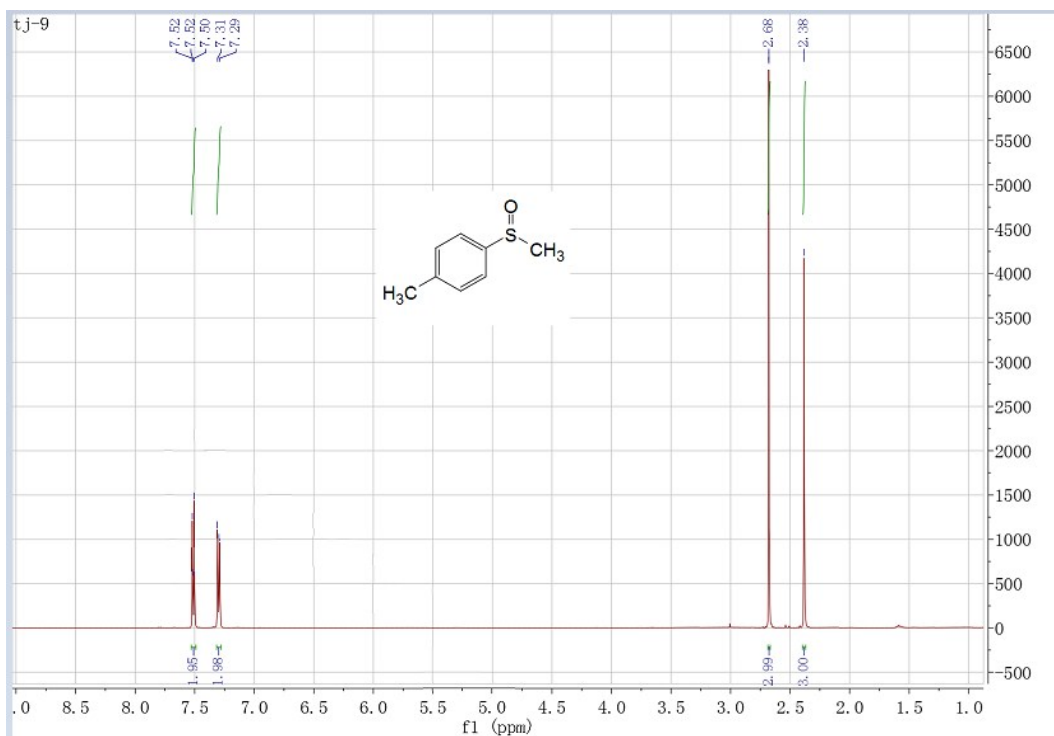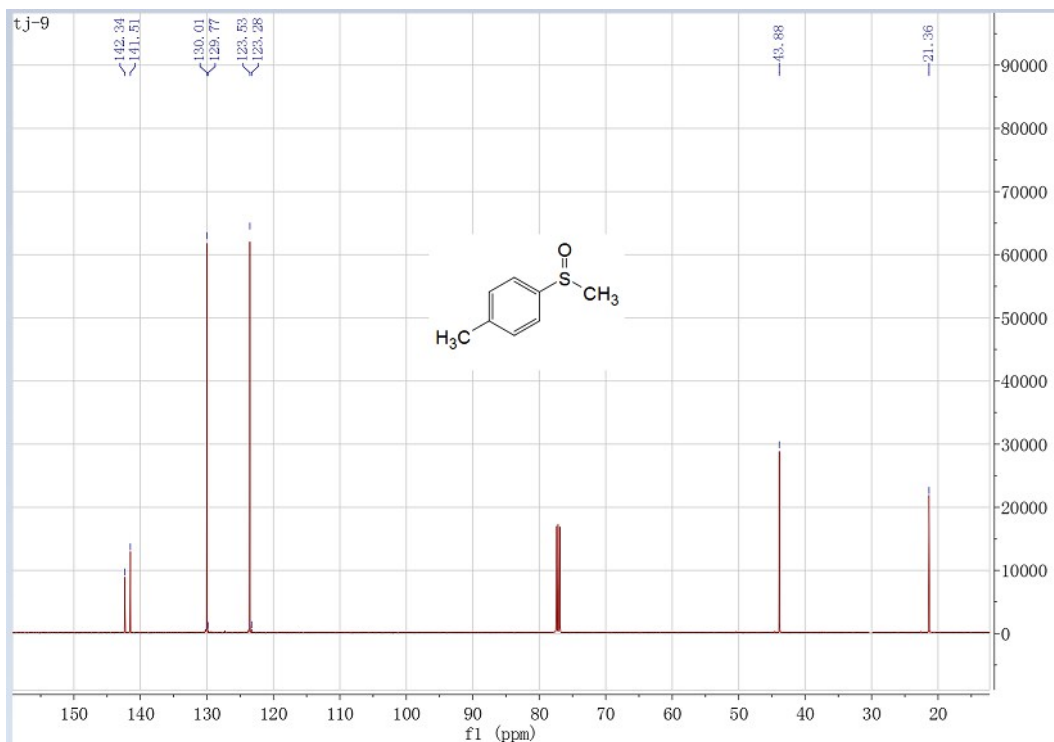

**4-Methoxyphenyl methyl sulfoxide.** Yellow oil, purified by flash chromatography on silica gel (ethyl acetate/petroleum ether,  $v/v = 2:3$ ) (98%).  $^1\text{H}$  NMR (500 MHz,  $\text{CDCl}_3$ )  $\delta$  (ppm): 7.61-7.56 (m, 2H), 7.04-7.00 (m, 2H), 3.84 (s, 3H), 2.69 (s, 3H);  $^{13}\text{C}$  NMR (126 MHz,  $\text{CDCl}_3$ )  $\delta$  (ppm): 162.0, 136.5, 129.5, 125.5, 114.9, 114.5, 55.5,

43.9. Determination of *ee* by HPLC analysis: *n*-hexane/2-PrOH (80:20), 1 mL/min, 254 nm,  $t_r$  (*S*) = 12.2 min,  $t_r$  (*R*) = 24.6 min.

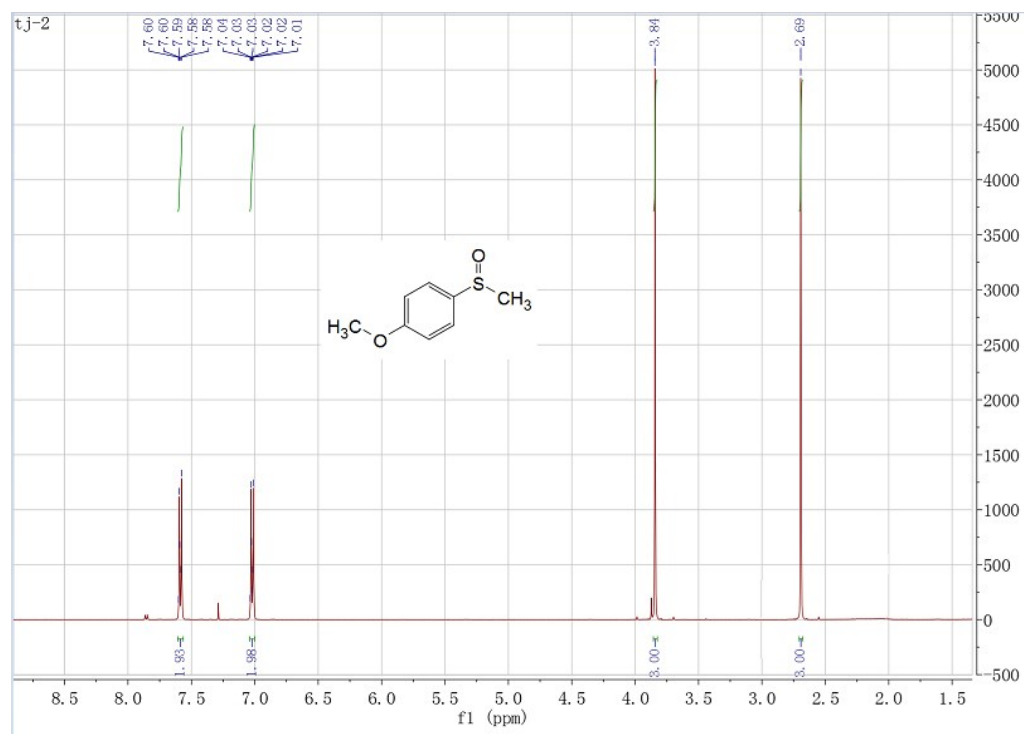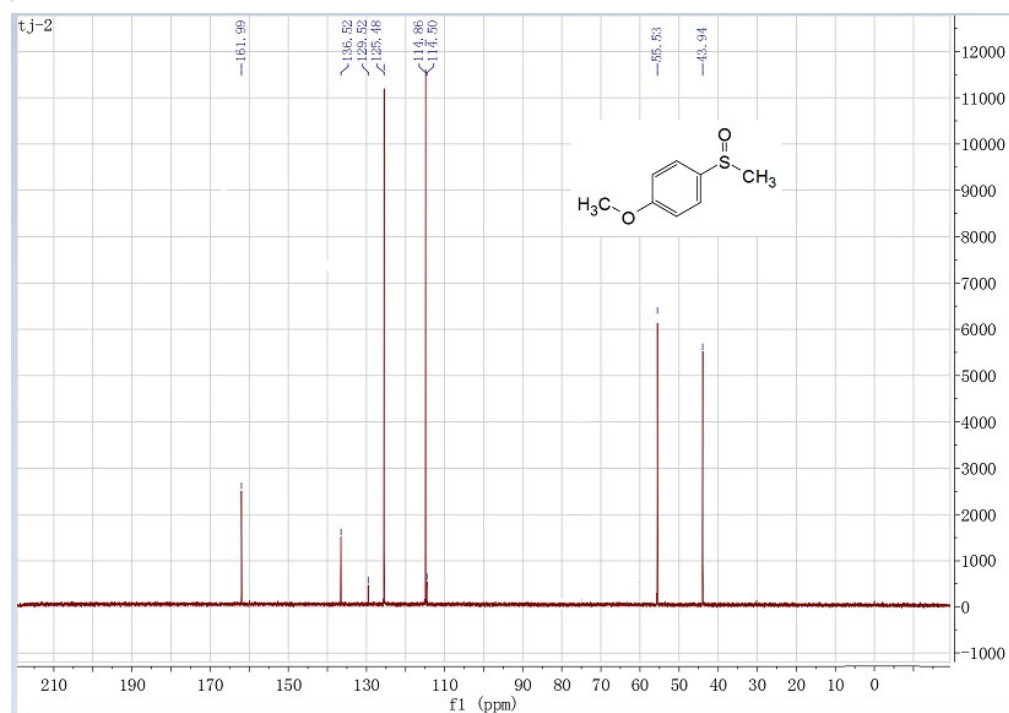

**Vinyl phenyl sulfoxide.** Yellow oil, purified by flash chromatography on silica gel (ethyl acetate/petroleum ether,  $v/v = 3:1$ ) (23%).  $^1\text{H}$  NMR (500 MHz,  $\text{CDCl}_3$ )  $\delta$  (ppm): 7.57 (dt,  $J = 4.6, 2.7$  Hz, 2H), 7.48-7.41 (m, 3H), 6.55 (m,  $J = 16.5, 9.6, 2.7$  Hz, 1H),

6.17-5.81 (m, 2H);  $^{13}\text{C}$  NMR (126 MHz,  $\text{CDCl}_3$ )  $\delta$  (ppm): 143.3, 143.0, 132.1, 131.2, 129.4, 125.7, 124.6, 120.6. Determination of *ee* by HPLC analysis: *n*-hexane/2-PrOH (90:10), 1 mL/min, 254 nm,  $t_r$  (*S*) = 18.8 min,  $t_r$  (*R*) = 30.1 min.

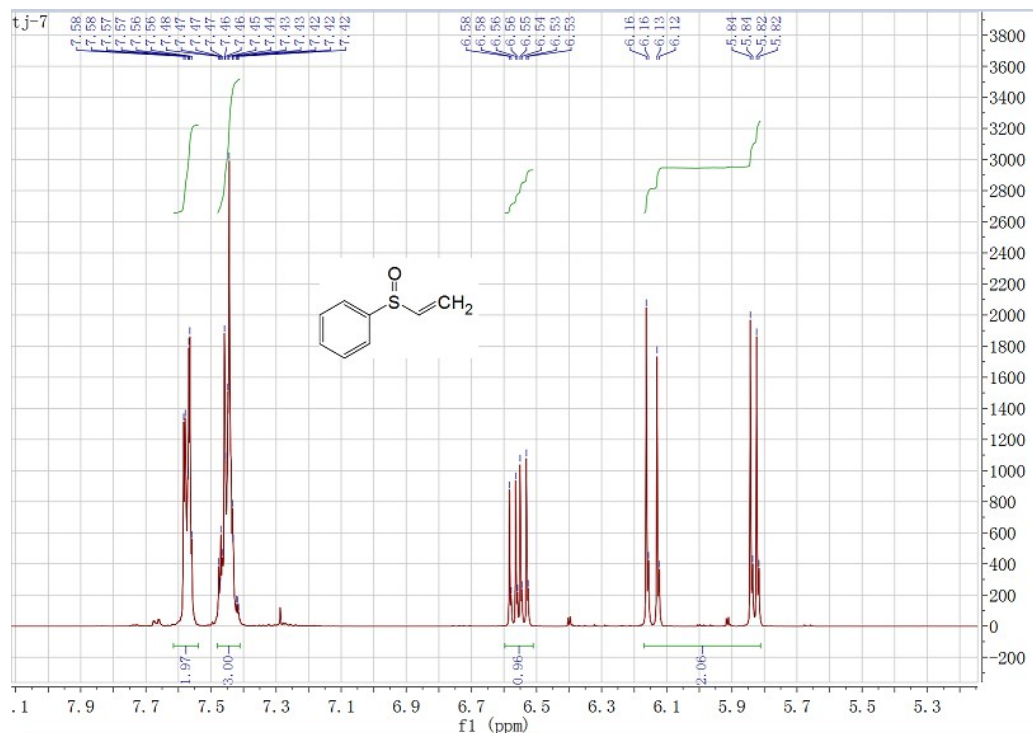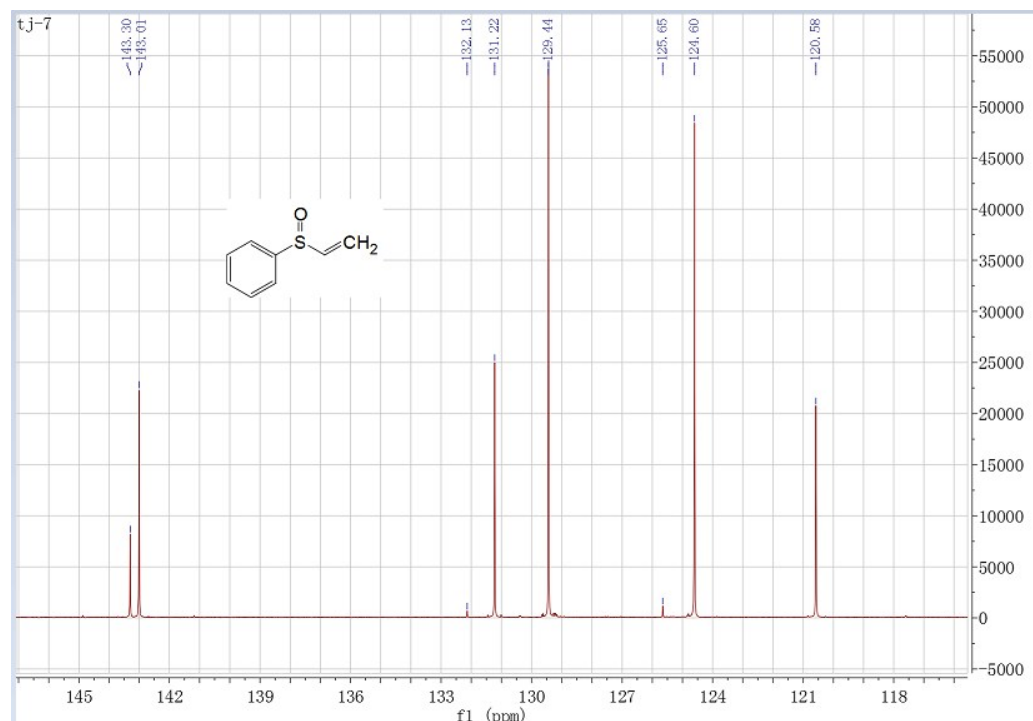

**Methyl benzyl sulfide.** Colorless oil, purified by flash chromatography on silica gel (ethyl acetate/petroleum ether,  $v/v = 1:1$ ) (87%).  $^1\text{H}$  NMR (500 MHz,  $\text{CDCl}_3$ )  $\delta$  (ppm): 7.43-7.36 (m, 3H), 7.33-7.30 (m, 2H), 4.02 (dd,  $J = 69.3, 12.8$  Hz, 2H), 2.48 (s,

3H);  $^{13}\text{C}$  NMR (126 MHz,  $\text{CDCl}_3$ )  $\delta$  (ppm): 130.5, 130.0, 129.7, 129.2, 129.0, 128.5, 60.4, 37.3. Determination of *ee* by HPLC analysis: *n*-hexane/2-PrOH (90:10), 1.5 mL/min, 210 nm,  $t_r$  (*S*) = 13.7 min,  $t_r$  (*R*) = 18.2 min.

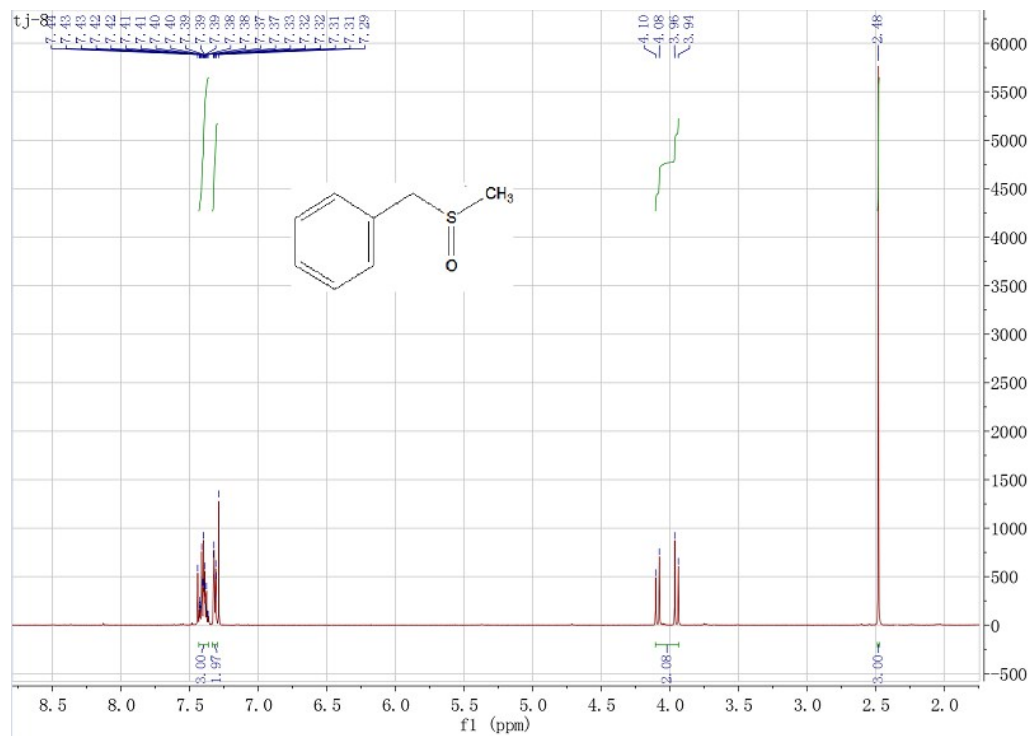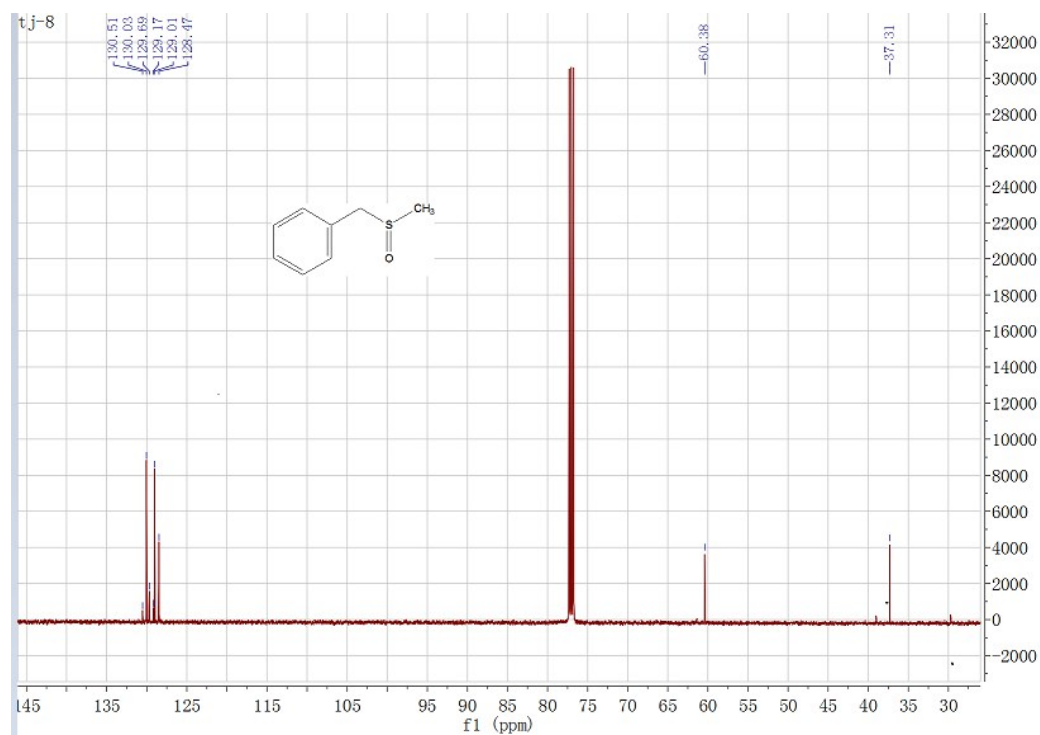

Supplement: c6ra08153c1.pdf [file c6ra08153c1.pdf]
